# Supplementary material for: Leucine-Rich Alpha-2-Glycoprotein: A Novel Predictor of Diastolic Dysfunction
Source: MDPI journal article supplement (doi:10.3390/biomedicines11030944), 2023-03-20
Supplement: s1 [file s1]

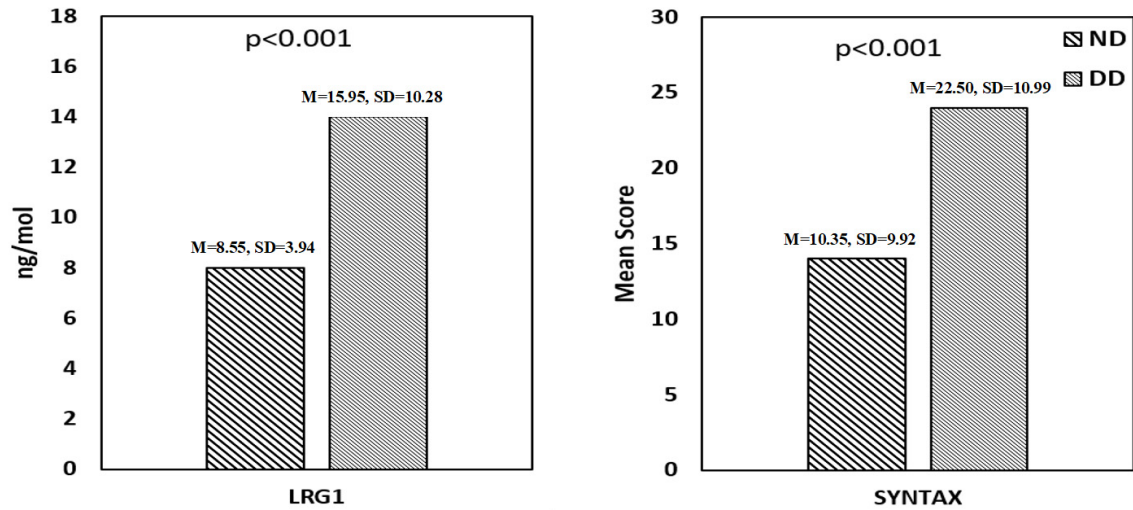

**Supplementary Figure S1.** Pairwise comparison of median of serum LRG1 levels and SYNTAX between No-DD and DD groups. Pairwise groups comparison was performed with Mann Whitney U Test.  $P<0.05^*$  was statistically significant. SYNTAX = Synergy Between Percutaneous Coronary Intervention with Taxus and Cardiac Surgery. No-DD = without diastolic dysfunction, DD = with diastolic dysfunction, M = Mean, SD = standard deviation.
